# Supplementary material for: A Comparative Study of Mesoporous Silica and Mesoporous Bioactive Glass Nanoparticles as Non-Viral MicroRNA Vectors for Osteogenesis
Source: MDPI journal article supplement (doi:10.3390/pharmaceutics14112302), 2022-10-26
Supplement: s1 [file s1]

**A**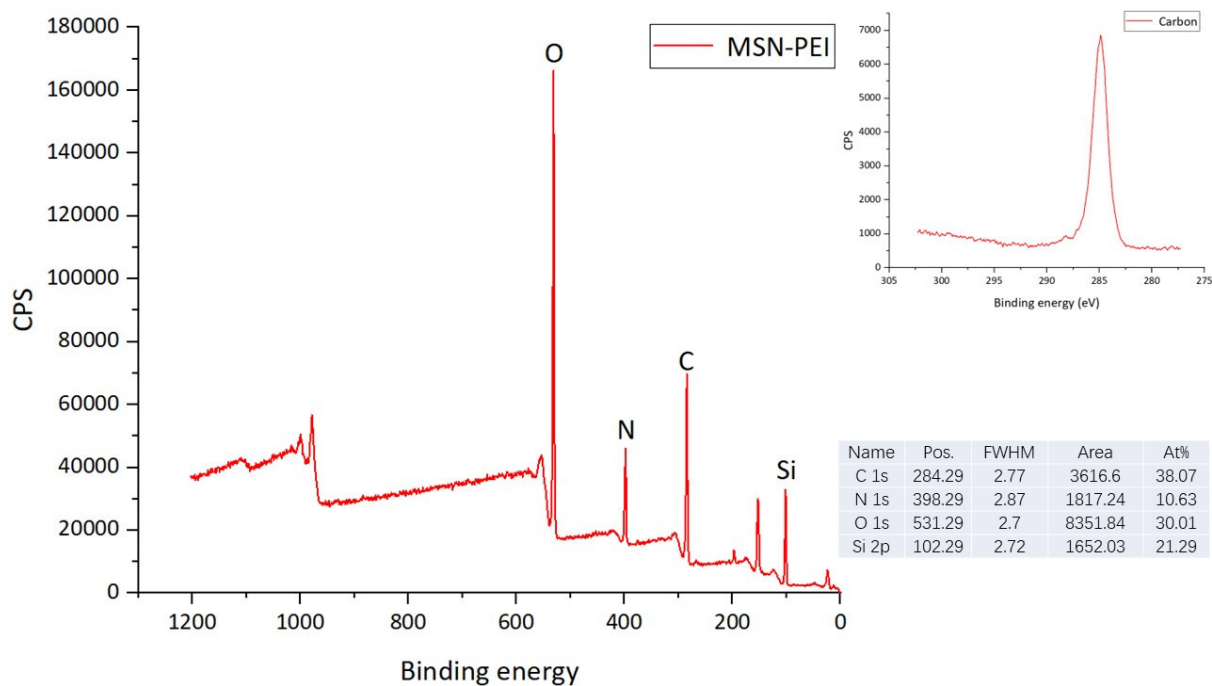**B**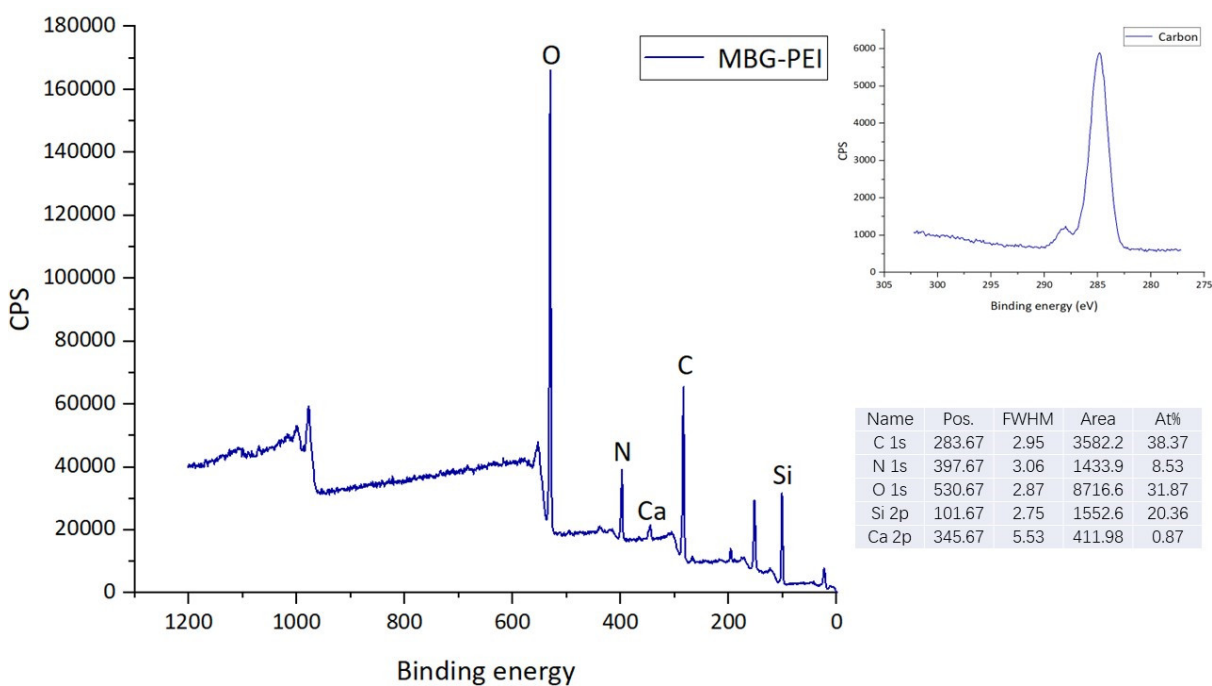

**Figure S1.** The X-ray photoelectron spectroscopy (XPS) analysis of MSN-PEI (A) and MBGN-PEI (B). Figures on the right are the high-resolution scan of carbon and the element analysis.
